# Supplementary material for: Genome-wide identification and functional characterization of CDPK gene family reveal their involvement in response to drought stress in Gossypium barbadense
Source: PeerJ. 2022 Feb 8;10:e12883. doi: 10.7717/peerj.12883 (PMC8833227; doi:10.7717/peerj.12883)
Supplement: Supplemental Information 8 [file peerj-10-12883-s008.xlsx]

## Sheet: Sheet1
	1h	3h	6h	12h	24h
GbCDPK4	7.26015	4.89056	2.60268	5.89708	3.65533
	8.33973	5.89708	2.88986	5.57897	3.75809
	8	5.28212	2.86791	6.6807	5.1337
	1h	3h	6h	12h	24h
GbCDPK19	0.151774	1.51572	0.039555	8.87656	1.51572
	0.180491	0.351111	0.128514	10.8528	3.63008
	0.05672	0.817902	0.075887	8.75435	3.605
	1h	3h	6h	12h	24h
GbCDPK23	0.181747	0.290188	1.26576	2.23457	0.458149
	0.486745	0.238159	1.38511	2.05252	0.114036
	0.474269	0.356013	1.32832	2.39496	0.605002
	1h	3h	6h	12h	24h
GbCDPK44	0.050214	0.097396	0.003139	0.042839	0.0528816
	0.049685	0.099442	0.002981	0.066338	0.044811
	0.028956	0.088388	0.038473	0.057897	0.059954
	1h	3h	6h	12h	24h
GbCDPK66	0.000348	0.445281	0.038208	0.499332	0.853176
	0.000161	0.373617	0.051832	0.595025	0.90125
	0.001039	0.361985	0.006302	0.324901	0.773782
	1h	3h	6h	12h	24h
GbCDPK78	0.752623	1.00422	0.016289	0.240137	0.102238
	0.952638	1.1638	0.036906	0.200267	0.063372
	0.646176	1.47427	0.138696	0.417544	0.077482
