# Supplementary material for: Genome-wide identification and functional characterization of CDPK gene family reveal their involvement in response to drought stress in Gossypium barbadense
Source: PeerJ. 2022 Feb 8;10:e12883. doi: 10.7717/peerj.12883 (PMC8833227; doi:10.7717/peerj.12883)
Supplement: Supplemental Information 9 [file peerj-10-12883-s009.xlsx]

## Sheet: Sheet1
				Mean
TRV-00	1.93187	2.03164	1.83187	1.93179
TRV-A32	0.624165	0.651456	0.584156	0.619926
TRV-D26	0.721965	0.751978	0.691937	0.72196
TRV-D32	0.438303	0.538303	0.488303	0.488303
TRV-D38	0.264866	0.284769	0.204876	0.251504
TRV-D41	0.909618	1.00965	0.809345	0.909539
