# Supplementary material for: Genome-wide identification and functional characterization of CDPK gene family reveal their involvement in response to drought stress in Gossypium barbadense
Source: PeerJ. 2022 Feb 8;10:e12883. doi: 10.7717/peerj.12883 (PMC8833227; doi:10.7717/peerj.12883)
Supplement: Supplemental Information 10 [file peerj-10-12883-s010.xlsx]

## Sheet: Water loss rate
	1	2	3	4	5
TRV-00	0.05	0.1	0.16	0.17	0.18
TRV-GbCDPK32	0.2	0.24	0.28	0.29	0.31
TRV-GbDCDPK26	0.2	0.36	0.41	0.44	0.46
TRV-GbDCDPK32	0.13	0.24	0.25	0.27	0.28
TRV-GbDCDPK38	0.495	0.53	0.565	0.585	0.585
TRV-GbDCDPK41	0.07	0.13	0.15	0.2	0.23

## Sheet: Relative water content
	TRV-00			mean	TRV-GbCDPK32			mean	TRV-GbCDPK68			mean	TRV-GbCDPK74			mean	TRV-GbCDPK80			mean	TRV-GbCDPK83			mean
Mock	52.366	65.381	70.862	62.8697	46.664	58.025	63.295	55.9947	43.959	64.084	72.106	60.0497	53.911	54.382	70.596	59.6297	43.346	54.6	40.383	46.1097	62.099	72.5	42.01	58.8697
Drought	44.244	42.94	53.052	46.7453	26.625	15.63	20.866	21.0403	23.284	8.092	9.079	13.485	28.495	10.03	27.926	22.1503	29.601	7.232	28.088	21.6403	22.715	39.103	16.498	26.1053

## Sheet: Relative electrical conductivit
	TRV-00			mean	TRV-GbCDPK32			mean	TRV-GbCDPK68			mean	TRV-GbCDPK74			mean	TRV-GbCDPK80			mean	TRV-GbCDPK83			mean
Mock	42.571	35.681	27.109	35.1203	24.385	31.636	32.63	29.5503	9.898	30.103	32.75	24.2503	31.584	33.888	7.699	24.3903	33.545	35.139	12.735	27.1397	38.94	14.095	24.11	25.715
Drought	59.192	70.891	54.358	61.4803	70.672	71.431	80.556	74.2197	67.233	89.348	59.478	72.0197	76.511	57.676	64.924	66.3703	56.181	69.942	54.418	60.1803	76.55	61.051	92.05	76.5503

## Sheet: Malondialdehyde content
	TRV-00			mean	TRV-GbCDPK32			mean	TRV-GbCDPK68			mean	TRV-GbCDPK74			mean	TRV-GbCDPK80			mean	TRV-GbCDPK83			mean
Mock	0.88085	0.68875	0.8528	0.807467	1.032	1.182	1.131	1.115	1.06829	1.25586	1.07847	1.13421	1.19877	1.16439	1.16914	1.17743	1.14741	1.08222	1.19565	1.14176	1.04305	0.93576	0.88283	0.95388
Drought	1.60147	1.89299	1.97466	1.82304	1.99238	1.99274	2.16757	2.0509	2.50888	2.20814	2.61449	2.44384	2.37572	2.38685	2.37298	2.37852	2.41939	2.36025	2.57791	2.45252	2.89719	2.87475	2.91961	2.89718

## Sheet: Proline content
	TRV-00			mean	TRV-GbCDPK32			mean	TRV-GbCDPK68			mean	TRV-GbCDPK74			mean	TRV-GbCDPK80			mean	TRV-GbCDPK83			mean
Mock	62.6814	59.2135	64.0975	61.9975	40.4781	35.3388	39.761	38.526	76.3543	79.3917	79.4926	78.4129	48.1481	47.5495	46.0109	47.2362	44.415	42.4652	42.4539	43.1114	43.4519	43.4097	46.1786	44.3467
Drought	128.973	124.569	129.373	127.638	88.848	90.5956	88.7096	89.3844	94.7146	95.9125	98.3879	96.3383	99.273	99.2315	101.872	100.126	77.5672	75.3342	76.8096	76.5703	77.6266	65.8655	70.3269	71.273

## Sheet: Soluble sugar content
	TRV-00			mean	TRV-GbCDPK32			mean	TRV-GbCDPK68			mean	TRV-GbCDPK74			mean	TRV-GbCDPK80			mean	TRV-GbCDPK83			mean
Mock	1734.43	1653.06	1758.32	1715.27	1117.84	1073.67	1114.16	1101.89	1258.56	1325.78	1133.63	1239.32	1387.25	1288.41	1294.06	1323.24	1335.16	1341.04	1355.55	1343.92	1463.11	1437.3	1475.53	1458.65
Drought	2107.31	2154.71	2023.38	2095.13	1315.16	1499.53	1283.95	1366.21	1885.14	2016.53	1889.95	1930.54	1817.9	1819.6	1828.17	1821.89	1872.83	1841.39	1738.07	1817.43	1893.79	1941.77	1947.54	1927.7
